# Supplementary material for: Ba2B10O17: a new centrosymmetric alkaline-earth metal borate with a deep-UV cut-off edge
Source: Royal Society of Chemistry journal article supplement (doi:10.1039/c4dt00546e), 2014-01-01

## Supporting Information

### **Ba<sub>2</sub>B<sub>10</sub>O<sub>17</sub>: A New Centrosymmetric Alkaline-Earth Metal Borate with Deep-UV Cut-Off Edge**

**Lili Liu,<sup>a,b</sup> Xin Su,<sup>a</sup> Yun Yang,<sup>a\*</sup> Shilie Pan,<sup>a\*</sup> Xiaoyu Dong,<sup>a</sup> Shujuan Han,<sup>a</sup>  
Min Zhang,<sup>a</sup> Jing Kang,<sup>a,b</sup> Zhihua Yang<sup>a\*</sup>**

<sup>a</sup> Key Laboratory of Functional Materials and Devices for Special Environments  
of CAS, Xinjiang Technical Institute of physics & Chemistry of CAS, Xinjiang Key  
Laboratory of Electronic Information Materials and Devices, 40-1 South Beijing Road,  
Urumqi 830011, China

<sup>b</sup> University of Chinese Academy of Sciences, Beijing 100049, China

\*To whom correspondence should be addressed

E-mail: yangyun@ms.xjb.ac.cn, slpan@ms.xjb.ac.cn (Shilie Pan)

Tel: (86)-991-3674558

Fax: (86)-991-3838957

**Table S1** Atomic coordinates ( $\times 10^4$ ) and equivalent isotropic displacement parameters ( $\text{\AA}^2 \times 10^3$ ) for  $\text{Ba}_2\text{B}_{10}\text{O}_{17}$ .  $U_{\text{eq}}$  is defined as one-third of the trace of the orthogonalized  $U_{ij}$  tensor.

|       | x        | y       | z        | U(eq) |
|-------|----------|---------|----------|-------|
| Ba(1) | 2483(1)  | 9802(1) | 2217(1)  | 10(1) |
| Ba(2) | 2731(1)  | 5234(1) | 2974(1)  | 12(1) |
| B(1)  | 2228(6)  | 1973(5) | -1299(4) | 8(1)  |
| B(2)  | 130(6)   | 2669(5) | 4827(4)  | 8(1)  |
| B(3)  | -2941(6) | 7041(5) | 3825(5)  | 10(1) |
| B(4)  | 4818(6)  | 2323(5) | 267(4)   | 8(1)  |
| B(5)  | -1457(6) | 2433(5) | -243(4)  | 8(1)  |
| B(6)  | 2622(6)  | 4957(5) | -288(5)  | 11(1) |
| B(7)  | 2413(7)  | 50(5)   | 5447(5)  | 11(1) |
| B(8)  | -1965(6) | 3872(5) | 2813(4)  | 8(1)  |
| B(9)  | 3582(7)  | 7468(5) | 5172(5)  | 10(1) |
| B(10) | -2561(6) | 1106(5) | 1989(4)  | 10(1) |
| O(1)  | 3767(4)  | 3764(3) | 544(3)   | 12(1) |
| O(2)  | 1529(4)  | 6039(3) | 347(3)   | 12(1) |
| O(3)  | 3373(4)  | 7697(3) | 710(3)   | 10(1) |
| O(4)  | 6565(4)  | 3162(3) | 3349(3)  | 10(1) |
| O(5)  | -207(4)  | 3664(3) | 3446(3)  | 11(1) |
| O(6)  | 3770(4)  | 8963(3) | 4899(3)  | 11(1) |
| O(7)  | 5475(4)  | 1350(3) | 1623(3)  | 9(1)  |
| O(8)  | 1846(4)  | 7442(3) | 4461(3)  | 12(1) |
| O(9)  | 1543(4)  | 1298(3) | 4565(3)  | 13(1) |
| O(10) | 6570(4)  | 7825(3) | 2529(3)  | 12(1) |
| O(11) | -1798(4) | 135(3)  | 3183(3)  | 11(1) |
| O(12) | -218(4)  | 8061(3) | 1269(3)  | 10(1) |
| O(13) | -1058(4) | 1611(3) | 1153(3)  | 11(1) |
| O(14) | 7480(4)  | 4976(3) | 1664(3)  | 13(1) |
| O(15) | 3265(4)  | 1692(3) | -133(3)  | 12(1) |
| O(16) | -1026(4) | 6653(3) | 4311(3)  | 15(1) |
| O(17) | 4483(4)  | 3441(3) | 5372(3)  | 15(1) |

**Table S2** Bond lengths (Å) and angles (°) for Ba<sub>2</sub>B<sub>10</sub>O<sub>17</sub>.

|               |           |                   |           |
|---------------|-----------|-------------------|-----------|
| Ba(1)-O(10)   | 2.879(3)  | O(13)-Ba(1)-O(3)  | 102.26(8) |
| Ba(1)-O(11)   | 2.871(2)  | O(13)-Ba(1)-O(15) | 68.05(8)  |
| Ba(1)-O(12)   | 3.174(3)  | O(3)-Ba(1)-O(15)  | 88.48(8)  |
| Ba(1)-O(13)   | 2.697(3)  | O(13)-Ba(1)-O(6)  | 131.29(8) |
| Ba(1)-O(15)   | 2.748(3)  | O(3)-Ba(1)-O(6)   | 116.66(8) |
| Ba(1)-O(3)    | 2.728(3)  | O(15)-Ba(1)-O(6)  | 136.50(8) |
| Ba(1)-O(6)    | 2.784(3)  | O(13)-Ba(1)-O(7)  | 106.41(8) |
| Ba(1)-O(7)    | 2.790(2)  | O(3)-Ba(1)-O(7)   | 110.41(7) |
| Ba(1)-O(8)    | 2.934(3)  | O(15)-Ba(1)-O(7)  | 49.89(8)  |
| Ba(1)-O(9)    | 2.963(3)  | O(6)-Ba(1)-O(7)   | 87.07(7)  |
| Ba(2)-O(1)    | 3.019(3)  | O(13)-Ba(1)-O(11) | 48.82(8)  |
| Ba(2)-O(12)   | 3.175(3)  | O(3)-Ba(1)-O(11)  | 105.34(7) |
| Ba(2)-O(14)   | 3.262(3)  | O(15)-Ba(1)-O(11) | 116.81(8) |
| Ba(2)-O(16)   | 2.853(3)  | O(6)-Ba(1)-O(11)  | 91.41(7)  |
| Ba(2)-O(16)#2 | 3.215(3)  | O(7)-Ba(1)-O(11)  | 140.62(8) |
| Ba(2)-O(17)   | 2.794(3)  | O(13)-Ba(1)-O(10) | 163.33(8) |
| Ba(2)-O(2)    | 2.714(3)  | O(3)-Ba(1)-O(10)  | 65.08(8)  |
| Ba(2)-O(3)    | 3.015(3)  | O(15)-Ba(1)-O(10) | 99.65(8)  |
| Ba(2)-O(4)    | 2.794(3)  | O(6)-Ba(1)-O(10)  | 65.37(7)  |
| Ba(2)-O(5)    | 2.778(2)  | O(7)-Ba(1)-O(10)  | 70.54(8)  |
| Ba(2)-O(8)    | 2.800(3)  | O(11)-Ba(1)-O(10) | 142.47(8) |
| B(1)-O(10)#9  | 1.396(5)  | O(13)-Ba(1)-O(8)  | 114.35(7) |
| B(1)-O(12)#1  | 1.356(5)  | O(3)-Ba(1)-O(8)   | 82.60(8)  |
| B(1)-O(15)    | 1.362(5)  | O(15)-Ba(1)-O(8)  | 171.06(8) |
| B(2)-O(16)#8  | 1.473(5)  | O(6)-Ba(1)-O(8)   | 49.07(7)  |
| B(2)-O(5)#7   | 1.501(5)  | O(7)-Ba(1)-O(8)   | 133.37(7) |
| B(2)-O(8)#8   | 1.450(5)  | O(11)-Ba(1)-O(8)  | 66.54(8)  |
| B(2)-O(9)     | 1.471(5)  | O(10)-Ba(1)-O(8)  | 76.10(7)  |
| B(3)-O(10)#10 | 1.373(5)  | O(13)-Ba(1)-O(9)  | 87.70(8)  |
| B(3)-O(16)    | 1.348(5)  | O(3)-Ba(1)-O(9)   | 162.02(8) |
| B(3)-O(17)#2  | 1.362(5)  | O(15)-Ba(1)-O(9)  | 109.23(8) |
| B(4)-O(1)     | 1.468(5)  | O(6)-Ba(1)-O(9)   | 47.80(8)  |
| B(4)-O(15)#6  | 1.489(5)  | O(7)-Ba(1)-O(9)   | 80.37(7)  |
| B(4)-O(3)#3   | 1.464(4)  | O(11)-Ba(1)-O(9)  | 69.95(7)  |
| B(4)-O(7)#6   | 1.504(5)  | O(10)-Ba(1)-O(9)  | 107.50(8) |
| B(5)-O(2) #1  | 1.468 (5) | O(8)-Ba(1)-O(9)   | 79.65(8)  |
| B(5)-O(12)#1  | 1.482(4)  | O(13)-Ba(1)-O(12) | 69.32(8)  |
| B(5)-O(12)    | 1.475 (5) | O(3)-Ba(1)-O(12)  | 46.19(7)  |
| B(5)-O(3) #1  | 1.458(5)  | O(15)-Ba(1)-O(12) | 104.58(7) |
| B(6)-O(1)     | 1.363(5)  | O(6)-Ba(1)-O(12)  | 118.54(7) |
| B(6)-O(14)#3  | 1.371(5)  | O(7)-Ba(1)-O(12)  | 150.16(7) |

|                       |          |                    |           |
|-----------------------|----------|--------------------|-----------|
| B(6)-O(2)             | 1.352(5) | O(11)-Ba(1)-O(12)  | 59.36(7)  |
| B(7)-O(11)#8          | 1.370(5) | O(10)-Ba(1)-O(12)  | 104.77(7) |
| B(7)-O(6)             | 1.367(5) | O(8)-Ba(1)-O(12)   | 69.48(7)  |
| B(7)-O(9)             | 1.361(6) | O(9)-Ba(1)-O(12)   | 127.64(7) |
| B(8)-O(14)#10         | 1.395(5) | O(2)-Ba(2)-O(5)    | 85.37(8)  |
| B(8)-O(4)#10          | 1.361(5) | O(2)-Ba(2)-O(17)   | 159.02(9) |
| B(8)-O(5)             | 1.347(5) | O(5)-Ba(2)-O(17)   | 86.28(8)  |
| B(9)-O(17)#5          | 1.475(5) | O(2)-Ba(2)-O(4)    | 114.75(8) |
| B(9)-O(4)#5           | 1.472(5) | O(5)-Ba(2)-O(4)    | 105.05(8) |
| B(9)-O(6)             | 1.477(5) | O(17)-Ba(2)-O(4)   | 49.56(7)  |
| B(9)-O(8)             | 1.444(5) | O(2)-Ba(2)-O(8)    | 115.95(8) |
| B(10)#4-O(7)          | 1.349(5) | O(5)-Ba(2)-O(8)    | 113.83(8) |
| B(10)-O(11)           | 1.396(5) | O(17)-Ba(2)-O(8)   | 85.03(8)  |
| B(10)-O(13)           | 1.365(5) | O(4)-Ba(2)-O(8)    | 116.98(8) |
| O(8)-B(9)-O(4)#5      | 112.6(3) | O(2)-Ba(2)-O(16)   | 98.92(8)  |
| O(8)-B(9)-O(17)#5     | 109.2(3) | O(5)-Ba(2)-O(16)   | 67.82(8)  |
| O(4)#5-B(9)-O(17)#5   | 105.2(3) | O(17)-Ba(2)-O(16)  | 95.68(8)  |
| O(8)-B(9)-O(6)        | 109.0(3) | O(4)-Ba(2)-O(16)   | 145.23(8) |
| O(4)#5-B(9)-O(6)      | 112.7(3) | O(8)-Ba(2)-O(16)   | 48.20(7)  |
| O(17)#5-B(9)-O(6)     | 108.0(3) | O(2)-Ba(2)-O(3)    | 49.77(8)  |
| O(7)#10-B(10)-O(13)   | 123.7(4) | O(5)-Ba(2)-O(3)    | 132.37(7) |
| O(7)#10-B(10)-O(11)   | 122.4(3) | O(17)-Ba(2)-O(3)   | 141.33(7) |
| O(13)-B(10)-O(11)     | 113.3(3) | O(4)-Ba(2)-O(3)    | 107.84(7) |
| O(13)-B(5)-O(12)#1    | 113.1(3) | O(8)-Ba(2)-O(3)    | 79.97(8)  |
| O(3)#1-B(5)-O(12)#1   | 105.7(3) | O(16)-Ba(2)-O(3)   | 100.25(8) |
| O(2)#1-B(5)-O(12)#1   | 104.2(3) | O(2)-Ba(2)-O(1)    | 46.85(8)  |
| O(2)-B(6)-O(1)        | 115.4(4) | O(5)-Ba(2)-O(1)    | 79.38(7)  |
| O(2)-B(6)-O(14)#3     | 122.6(4) | O(17)-Ba(2)-O(1)   | 112.58(8) |
| O(1)-B(6)-O(14)#3     | 121.9(4) | O(4)-Ba(2)-O(1)    | 71.60(7)  |
| O(9)-B(7)-O(6)        | 117.7(4) | O(8)-Ba(2)-O(1)    | 159.32(8) |
| O(9)-B(7)-O(11)#8     | 120.2(4) | O(16)-Ba(2)-O(1)   | 134.96(7) |
| O(6)-B(7)-O(11)#8     | 121.8(4) | O(3)-Ba(2)-O(1)    | 79.43(7)  |
| O(5)-B(8)-O(4)#10     | 122.5(4) | O(2)-Ba(2)-O(12)   | 45.88(8)  |
| O(5)-B(8)-O(14)#10    | 121.4(4) | O(5)-Ba(2)-O(12)   | 94.78(7)  |
| O(4)#10-B(8)-O(14)#10 | 115.5(3) | O(17)-Ba(2)-O(12)  | 154.37(7) |
| O(3)#3-B(4)-O(15)#6   | 113.5(3) | O(4)-Ba(2)-O(12)   | 151.51(7) |
| O(1)-B(4)-O(15)#6     | 109.5(3) | O(8)-Ba(2)-O(12)   | 71.08(7)  |
| O(3)#3-B(4)-O(7)#6    | 110.1(3) | O(16)-Ba(2)-O(12)  | 61.58(7)  |
| O(1)-B(4)-O(7)#6      | 107.0(3) | O(3)-Ba(2)-O(12)   | 44.56(6)  |
| O(15)#6-B(4)-O(7)#6   | 102.6(3) | O(1)-Ba(2)-O(12)   | 92.72(7)  |
| O(13)-B(5)-O(3)#1     | 111.5(3) | B(5)#1-Ba(2)-O(12) | 27.01(8)  |
| O(13)-B(5)-O(2)#1     | 111.0(3) | O(2)-Ba(2)-O(16)#2 | 131.82(7) |
| O(3)#1-B(5)-O(2)#1    | 111.0(3) | O(5)-Ba(2)-O(16)#2 | 46.63(7)  |

|                       |           |                     |           |
|-----------------------|-----------|---------------------|-----------|
| O(17)-Ba(2)-O(16)#2   | 44.95(7)  | O(1)-Ba(2)-O(14)    | 66.42(7)  |
| O(4)-Ba(2)-O(16)#2    | 86.61(7)  | O(12)-Ba(2)-O(14)   | 107.77(7) |
| O(16)#2-Ba(2)-O(14)   | 130.07(7) | O(8)-Ba(2)-O(16)#2  | 86.28(7)  |
| O(12)#1-B(1)-O(15)    | 122.4(3)  | O(16)-Ba(2)-O(16)#2 | 63.43(10) |
| O(12)#1-B(1)-O(10)#9  | 122.1(4)  | O(3)-Ba(2)-O(16)#2  | 163.42(7) |
| O(15)-B(1)-O(10)#9    | 115.3(3)  | O(1)-Ba(2)-O(16)#2  | 113.70(7) |
| O(8)#8-B(2)-O(9)      | 115.0(3)  | O(12)-Ba(2)-O(16)#2 | 121.80(7) |
| O(8)#8-B(2)-O(16)#8   | 104.3(3)  | O(2)-Ba(2)-O(14)    | 86.76(7)  |
| O(9)-B(2)-O(16)#8     | 112.8(3)  | O(5)-Ba(2)-O(14)    | 139.29(8) |
| O(8)#8-B(2)-O(5)#7    | 110.6(3)  | O(17)-Ba(2)-O(14)   | 87.08(7)  |
| O(9)-B(2)-O(5)#7      | 106.0(3)  | O(4)-Ba(2)-O(14)    | 44.45(7)  |
| O(16)#8-B(2)-O(5)#7   | 108.0(3)  | O(8)-Ba(2)-O(14)    | 105.51(7) |
| O(16)-B(3)-O(17)#2    | 118.6(4)  | O(16)-Ba(2)-O(14)   | 152.87(8) |
| O(16)-B(3)-O(10)#10   | 124.4(4)  | O(3)-Ba(2)-O(14)    | 63.44(7)  |
| O(17)#2-B(3)-O(10)#10 | 116.9(3)  | O(3)#3-B(4)-O(1)    | 113.3(3)  |

Symmetry transformations used to generate equivalent atoms:

|                   |                       |                     |
|-------------------|-----------------------|---------------------|
| #1 $-x, -y+2, -z$ | #2 $-x, -y+1, -z+1$   | #3 $-x+1, -y+1, -z$ |
| #4 $x+1, y, z$    | #5 $-x+1, -y+1, -z+1$ | #6 $x, y-1, z$      |
| #7 $x, y+1, z$    | #8 $-x, -y+2, -z+1$   | #9 $-x+1, -y+2, -z$ |
| #10 $x-1, y, z$   |                       |                     |

**Table S3** Bond valence analysis of Ba<sub>2</sub>B<sub>10</sub>O<sub>17</sub>.<sup>a,b</sup>

| O(8)  | O(9)  | O(10) | O(11) | O(12) | O(13) | O(14) | O(15) | O(16)        | O(17) | $\Sigma_{\text{cation}}$ |
|-------|-------|-------|-------|-------|-------|-------|-------|--------------|-------|--------------------------|
| 0.173 | 0.16  | 0.201 | 0.205 | 0.09  | 0.328 |       | 0.286 |              |       | 2.261                    |
| 0.249 |       |       |       | 0.09  |       | 0.071 |       | 0.215 /0.081 |       | 2.066                    |
|       |       | 0.935 |       | 1.041 |       |       | 1.025 |              |       | 3.001                    |
| 0.808 | 0.763 |       |       |       |       |       |       | 0.759        |       | 3.034                    |
|       |       | 0.995 |       |       |       |       |       | 1.064        | 1.025 | 3.084                    |
|       |       |       |       |       |       |       | 0.727 |              |       | 2.972                    |
|       |       |       |       | 0.741 | 0.79  |       |       |              |       | 3.056                    |
|       |       |       |       |       |       | 1     |       |              |       | 3.075                    |
|       | 1.027 |       | 1.003 |       |       |       |       |              |       | 3.041                    |
|       |       |       |       |       |       | 0.937 |       |              |       | 3.031                    |
| 0.821 |       |       |       |       |       |       |       |              | 0.755 | 3.088                    |
|       |       |       |       |       | 0.935 |       |       | 1.016        |       | 3.012                    |
| 2.051 | 1.95  | 2.131 | 2.143 | 1.962 | 2.134 | 2.008 | 2.038 | 2.119        | 2.033 |                          |

| Atom            | O(1)  | O(2)  | O(3)  | O(4)  | O(5)  | O(6)  | O(7)  |
|-----------------|-------|-------|-------|-------|-------|-------|-------|
| Ba(1)           |       |       | 0.302 |       |       | 0.26  | 0.255 |
| Ba(2)           | 0.138 | 0.314 | 0.139 | 0.253 | 0.264 |       |       |
| B(1)            |       |       |       |       |       |       |       |
| B(2)            |       |       |       |       | 0.704 |       |       |
| B(3)            |       |       |       |       |       |       |       |
| B(4)            | 0.769 |       | 0.778 |       |       |       | 0.698 |
| B(5)            |       | 0.755 | 0.769 |       |       |       |       |
| B(6)            | 1.022 | 1.053 |       |       |       |       |       |
| B(7)            |       |       |       |       |       | 1.011 |       |
| B(8)            |       |       |       | 1.027 | 1.067 |       |       |
| B(9)            |       |       |       | 0.761 |       | 0.751 |       |
| B(10)           |       |       |       |       |       |       | 1.061 |
| $\Sigma$ anions | 1.929 | 2.122 | 1.988 | 2.041 | 2.035 | 2.022 | 2.014 |

- a Bond valences calculated with the program Bond Valence Calculator Version 2.00, Hormillosa, C., Healy, S., Stephen, T. McMaster University (1993).
- b Valence sums calculated with the formula:  $S_i = \exp[(R_0 - R_i)/B]$ , where  $S_i$  = valence of bond "i" and  $B = 0.37$ . Superscripts indicate the number of equivalent bonds for anions.

**Table S4** (a) State energies (eV) of the highest valence band (H-VB) and the lowest conduction band (L-CB) at same k-points of Ba<sub>2</sub>B<sub>10</sub>O<sub>17</sub>. (b) The calculated lattice constants (*a*, *b* and *c*) and angles ( $\alpha$ ,  $\beta$  and  $\gamma$ ) between experimental and theoretical results for Ba<sub>2</sub>B<sub>10</sub>O<sub>17</sub>.

(a)

| Compound                                        | K-piont                 | H-VB (eV) | L-CB (eV) |
|-------------------------------------------------|-------------------------|-----------|-----------|
| Ba <sub>2</sub> B <sub>10</sub> O <sub>17</sub> | G (0.000, 0.000, 0.000) | 0         | 6.01063   |
|                                                 | F (0.000, 0.500, 0.000) | -0.03226  | 6.02353   |
|                                                 | Q (0.000,0.500, 0.500)  | 0.0119    | 5.96668   |
|                                                 | Z (0.000,0.000, 0.500)  | -0.00808  | 5.98812   |
|                                                 | G (0.000,0.000, 0.000)  | 0         | 6.01063   |

(b)

| Lattice parameters       | Experimental Value | Calculated Value |
|--------------------------|--------------------|------------------|
| a (Å)                    | 6.7128(3)          | 6.7128(0)        |
| b (Å)                    | 9.8698(4)          | 9.8698(0)        |
| c (Å)                    | 9.9998(4)          | 9.9998(0)        |
| $\alpha$ (°)             | 76.860(3)          | 76.860(0)        |
| $\beta$ (°)              | 83.200(3)          | 83.200(0)        |
| $\gamma$ (°)             | 73.332(3)          | 73.332(0)        |
| Volume (Å <sup>3</sup> ) | 617.07(4)          | 617.07(0)        |



**Table S5** The calculated bond lengths in comparison with experimental data, bond charge and bond order.

| bond type     | experiment<br>bond length (Å) | calculation<br>bond length<br>(Å) | bond charge<br>(e) | bond order<br>(e) |
|---------------|-------------------------------|-----------------------------------|--------------------|-------------------|
| Ba(1)-O(10)   | 2.879(3)                      | 2.8787(3)                         | 1.52               | 0.02              |
| Ba(1)-O(11)   | 2.871(2)                      | 2.8713(9)                         | 1.52               | -0.01             |
| Ba(1)-O(12)   | 3.174(3)                      | 3.1744(1)                         | 1.52               | 0.02              |
| Ba(1)-O(13)   | 2.697(3)                      | 2.6964(4)                         | 1.52               | 0.05              |
| Ba(1)-O(15)   | 2.748(3)                      | 2.7484(4)                         | 1.52               | 0.04              |
| Ba(1)-O(3)    | 2.728(3)                      | 2.7286(4)                         | 1.52               | 0.05              |
| Ba(1)-O(6)    | 2.784(3)                      | 2.7842(0)                         | 1.52               | 0.00              |
| Ba(1)-O(7)    | 2.790(2)                      | 2.7900(6)                         | 1.52               | 0.06              |
| Ba(1)-O(8)    | 2.934(3)                      | 2.9346(3)                         | 1.52               | 0.04              |
| Ba(1)-O(9)    | 2.963(3)                      | 2.9629(5)                         | 1.52               | 0.03              |
| Ba(2)-O(1)    | 3.019(3)                      | 3.0189(2)                         | 1.56               | 0.03              |
| Ba(2)-O(12)   | 3.175(3)                      | 3.1749(5)                         | 1.56               | 0.00              |
| Ba(2)-O(14)   | 3.262(3)                      | 3.2617(9)                         | 1.56               | -0.03             |
| Ba(2)-O(16)   | 2.853(3)                      | 2.8528(4)                         | 1.56               | 0.03              |
| Ba(2)-O(16)#2 | 3.215(3)                      | 2.8528(4)                         | 1.56               | 0.03              |
| Ba(2)-O(17)   | 2.794(3)                      | 2.7945(6)                         | 1.56               | 0.02              |
| Ba(2)-O(2)    | 2.714(3)                      | 2.7142(6)                         | 1.56               | 0.00              |
| Ba(2)-O(3)    | 3.015(3)                      | 3.0148(0)                         | 1.56               | 0.03              |
| Ba(2)-O(4)    | 2.794(3)                      | 2.7938(0)                         | 1.56               | 0.02              |
| Ba(2)-O(5)    | 2.778(2)                      | 2.7771(6)                         | 1.56               | 0.06              |
| Ba(2)-O(8)    | 2.800(3)                      | 2.7996(4)                         | 1.56               | 0.03              |
| B(1)-O(10)#9  | 1.396(5)                      | 1.3962(1)                         | 1.02               | 0.70              |
| B(1)-O(12)#1  | 1.356(5)                      | 1.3559(1)                         | 1.02               | 0.82              |
| B(1)-O(15)    | 1.362(5)                      | 1.3621(4)                         | 1.02               | 0.81              |
| B(2)-O(16)#8  | 1.473(5)                      | 1.4725(8)                         | 0.94               | 0.61              |
| B(2)-O(5)#7   | 1.501(5)                      | 1.5008(7)                         | 0.94               | 0.57              |
| B(2)-O(8)#8   | 1.450(5)                      | 1.4500(5)                         | 0.94               | 0.68              |
| B(2)-O(9)     | 1.471(5)                      | 1.4715(3)                         | 0.94               | 0.62              |
| B(3)-O(10)#10 | 1.373(5)                      | 1.3730(1)                         | 1.02               | 0.74              |
| B(3)-O(16)    | 1.348(5)                      | 1.3476(9)                         | 1.02               | 0.82              |
| B(3)-O(17)#2  | 1.362(5)                      | 1.3618(1)                         | 1.02               | 0.78              |
| B(4)-O(1)     | 1.468(5)                      | 1.4678(1)                         | 0.95               | 0.61              |
| B(4)-O(15)#6  | 1.489(5)                      | 1.4896(7)                         | 0.95               | 0.59              |
| B(4)-O(3)#3   | 1.464(4)                      | 1.4641(0)                         | 0.95               | 0.67              |
| B(4)-O(7)#6   | 1.504(5)                      | 1.5040(0)                         | 0.95               | 0.57              |
| B(5)-O(12)#1  | 1.482(4)                      | 1.4813(5)                         | 0.92               | 0.59              |
| B(5)-O(13)    | 1.458(5)                      | 1.4586(4)                         | 0.92               | 0.60              |
| B(5)-O(2) #1  | 1.468 (5)                     | 1.4749(9)                         | 0.92               | 0.62              |
| B(5)-O(3) #1  | 1.458(5)                      | 1.4672(9)                         | 0.92               | 0.67              |
| B(6)-O(1)     | 1.363(5)                      | 1.3624(5)                         | 1.02               | 0.80              |
| B(6)-O(14)#3  | 1.371(5)                      | 1.3713(9)                         | 1.02               | 0.74              |

---

|               |          |           |      |      |
|---------------|----------|-----------|------|------|
| B(6)-O(2)     | 1.352(5) | 1.3529(5) | 1.02 | 0.80 |
| B(7)-O(11)#8  | 1.370(5) | 1.3697(4) | 1.01 | 0.75 |
| B(7)-O(6)     | 1.367(5) | 1.3673(2) | 1.01 | 0.79 |
| B(7)-O(9)     | 1.361(6) | 1.3607(2) | 1.01 | 0.81 |
| B(8)-O(14)#10 | 1.395(5) | 1.3948(2) | 1.01 | 0.72 |
| B(8)-O(4)#10  | 1.361(5) | 1.3611(5) | 1.01 | 0.81 |
| B(8)-O(5)     | 1.347(5) | 1.3469(6) | 1.01 | 0.82 |
| B(9)-O(17)#5  | 1.475(5) | 1.4744(8) | 0.92 | 0.59 |
| B(9)-O(4)#5   | 1.472(5) | 1.4718(2) | 0.92 | 0.60 |
| B(9)-O(6)     | 1.477(5) | 1.4775(6) | 0.92 | 0.61 |
| B(9)-O(8)     | 1.444(5) | 1.4442(4) | 0.92 | 0.68 |
| B(10) -O(7)   | 1.349(5) | 1.3498(8) | 1.00 | 0.83 |
| B(10)-O(11)   | 1.396(5) | 1.3961(9) | 1.00 | 0.71 |
| B(10)-O(13)   | 1.365(5) | 1.3654(8) | 1.00 | 0.80 |

---

**Figure S1** Photograph of the  $\text{Ba}_2\text{B}_{10}\text{O}_{17}$  crystal. (The minimum scale of the ruler is one millimeter.)

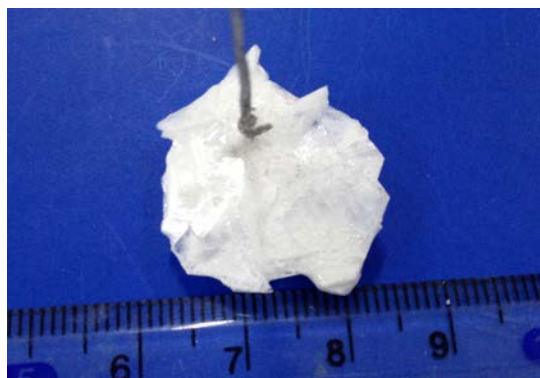

**Figure S2** Calculated and measured (after melting and before melting) powder X-ray diffraction patterns for  $\text{Ba}_2\text{B}_{10}\text{O}_{17}$ .

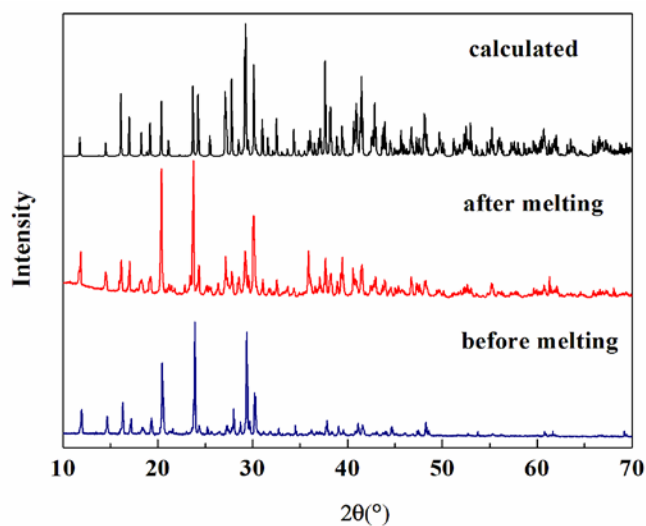

**Figure S3** Photograph of the  $\text{Ba}_2\text{B}_{10}\text{O}_{17}$  crystal. (The minimum scale of the ruler is one millimeter.)

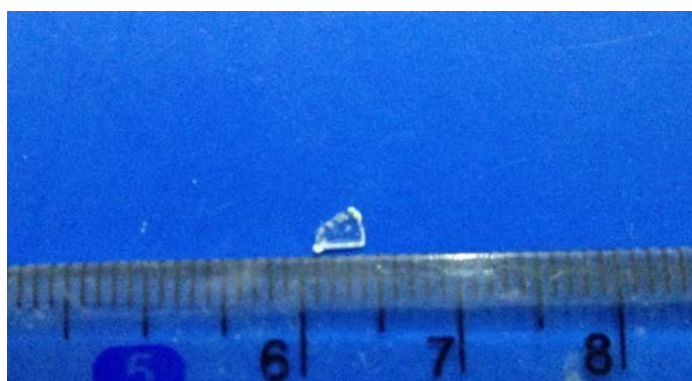

**Figure S4** Unit cell of  $\text{Ba}_2\text{B}_{10}\text{O}_{17}$ .

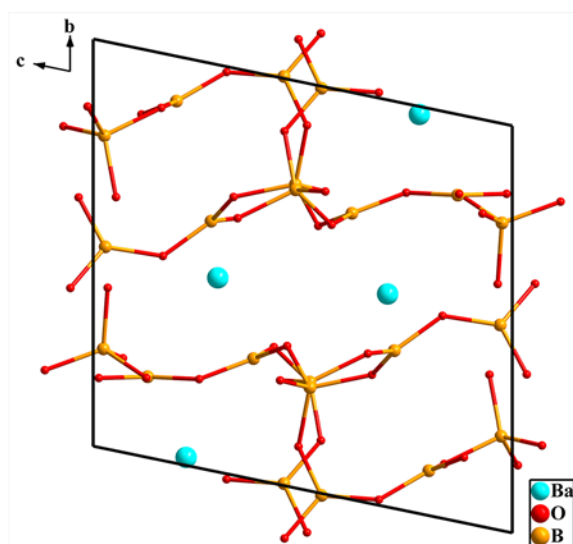

**Figure S5** (a)  $[\text{Ba}(1)\text{O}_{10}]$  polyhedra. (b)  $[\text{Ba}(2)_2\text{O}_{20}]$  dimers. (c) Perspective views of  $\text{Ba}_2\text{B}_{10}\text{O}_{17}$  along  $a$ -axis.

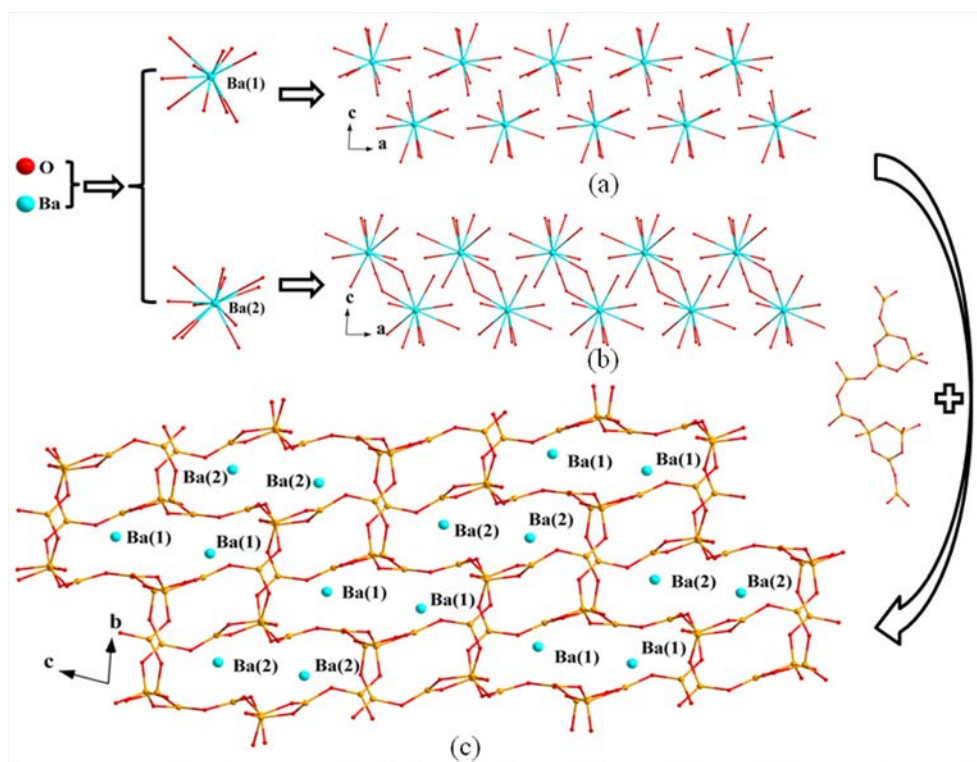

**Figure S6** (a) Interconnection between A-tunnel and B-tunnel. (b) The 3D network structure of B-O group in  $\text{Ba}_2\text{B}_{10}\text{O}_{17}$ . (c) The overall view of  $\text{Ba}_2\text{B}_{10}\text{O}_{17}$  seen along the  $a$ -axis.

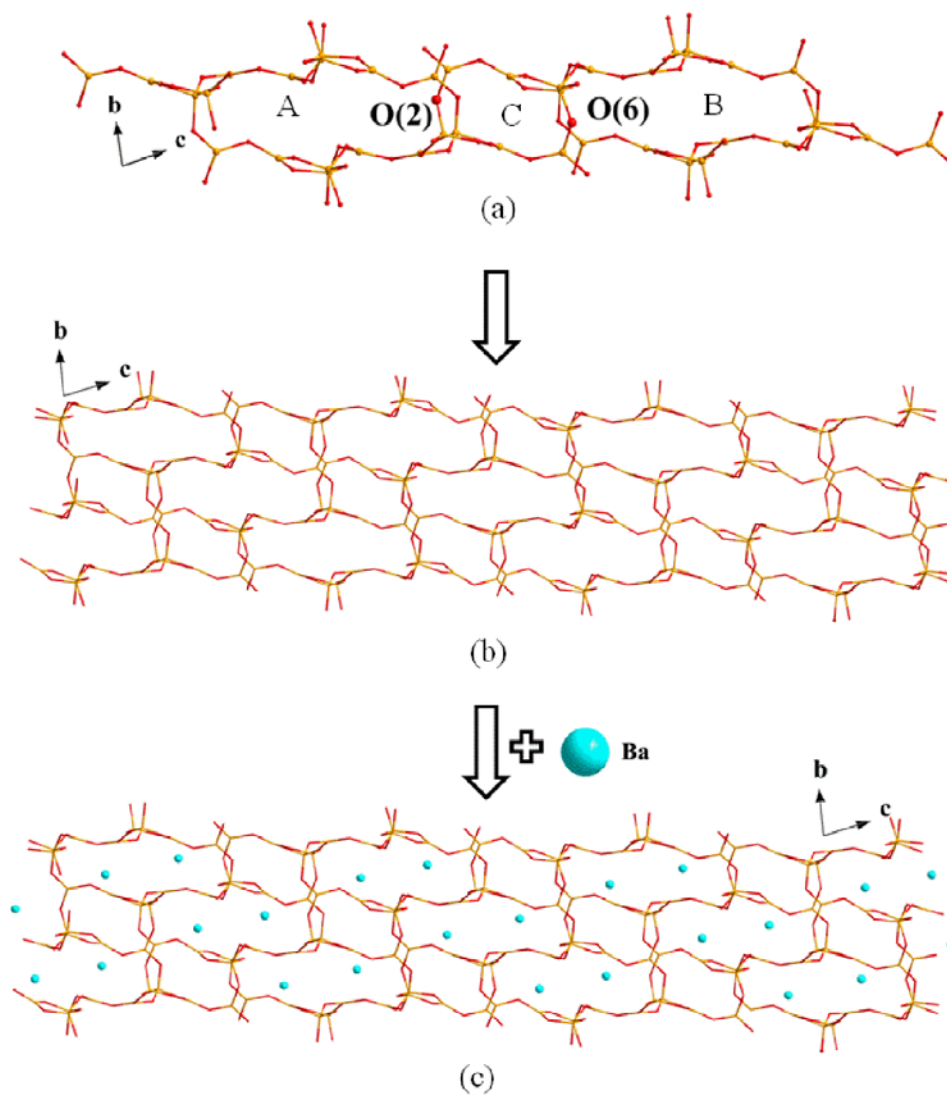

**Figure S7** The unit cells of (a)  $\text{Cs}_2\text{K}_2\text{B}_{10}\text{O}_{17}$ , (b)  $\text{Na}_2\text{Cs}_2\text{B}_{10}\text{O}_{17}$  and (c)  $\text{Na}_2\text{Tl}_2\text{B}_{10}\text{O}_{17}$ .

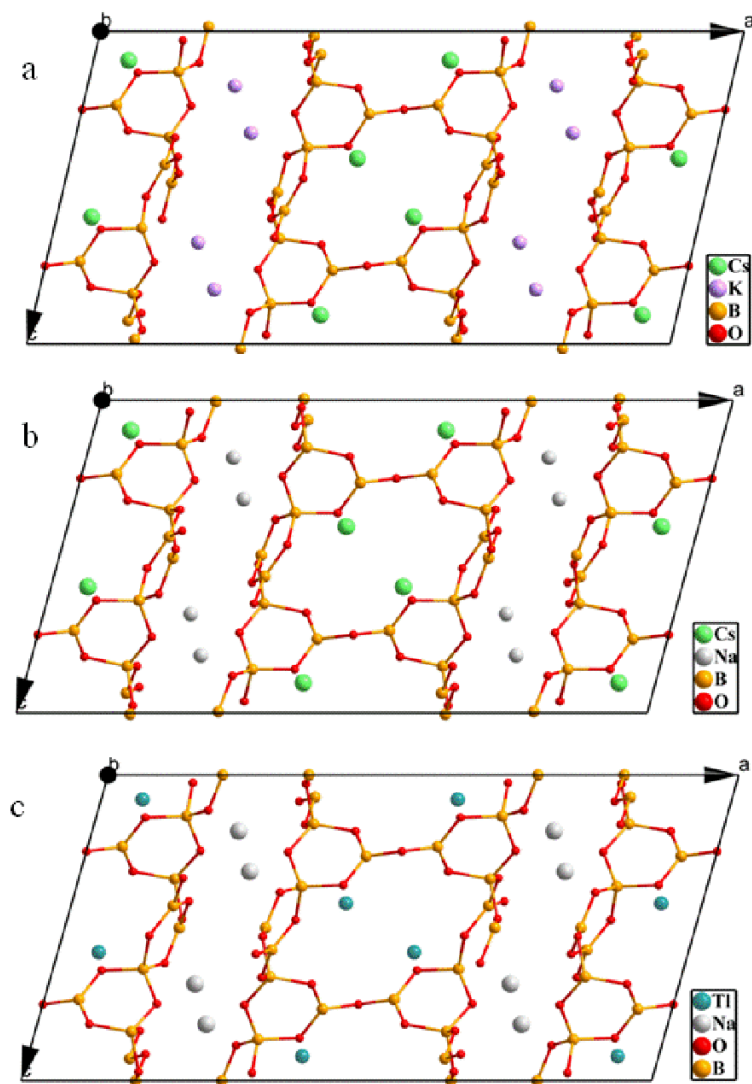

**Figure S8** Infrared spectroscopy of  $\text{Ba}_2\text{B}_{10}\text{O}_{17}$ .

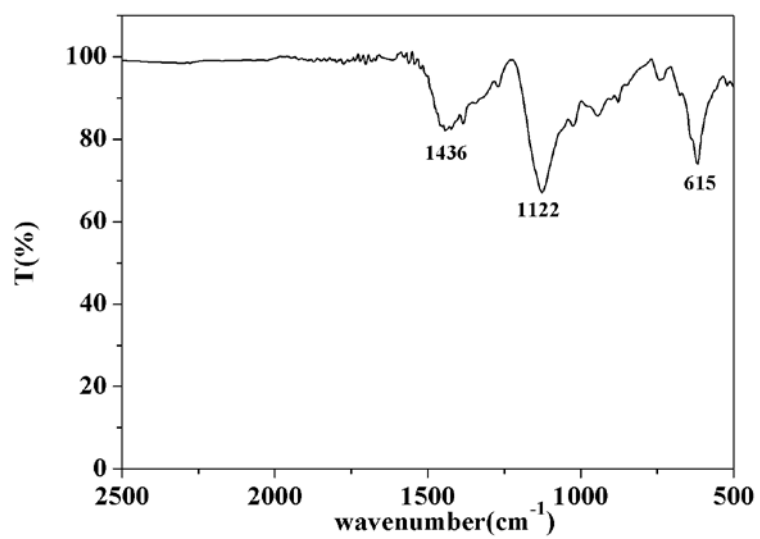

**Figure S9** Transmittance spectroscopy of  $\text{Ba}_2\text{B}_{10}\text{O}_{17}$ .

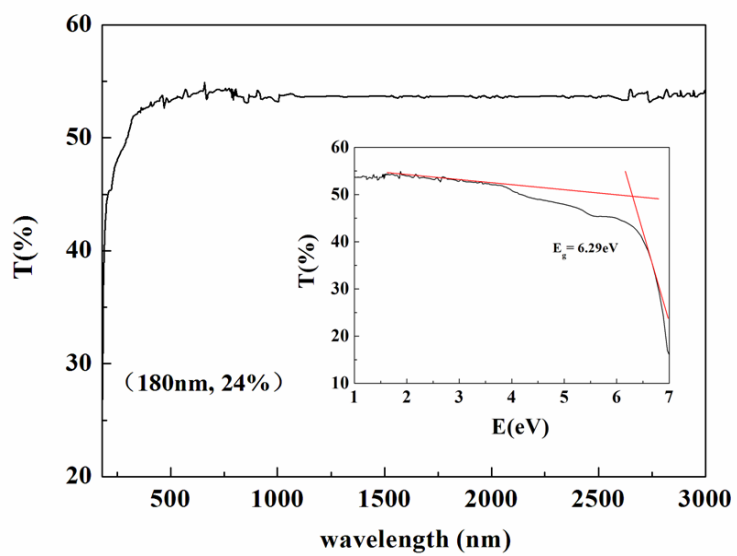

**Figure S10** The TG-DSC curves for  $\text{Ba}_2\text{B}_{10}\text{O}_{17}$ .

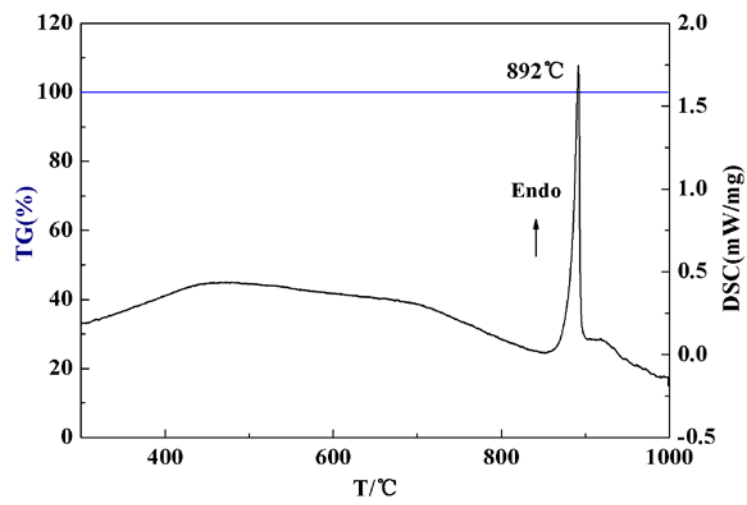

**Figure S11** Calculated band structure of  $\text{Ba}_2\text{B}_{10}\text{O}_{17}$ .

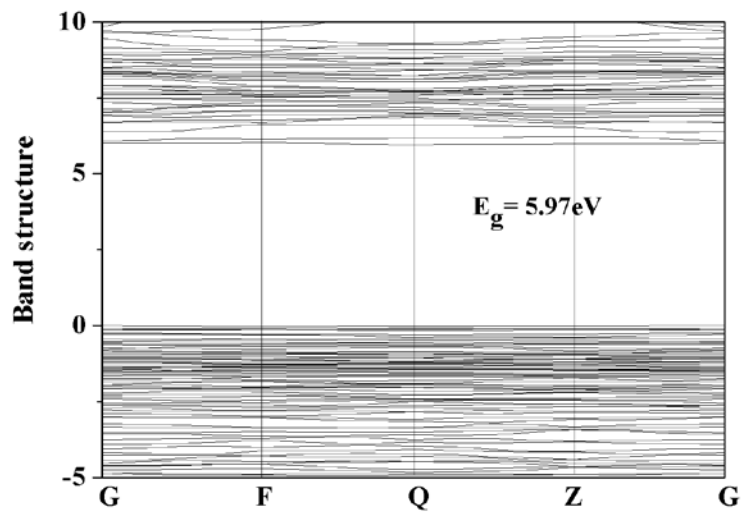



**Figure S12** Brillouin zone of  $\text{Ba}_2\text{B}_{10}\text{O}_{17}$ .

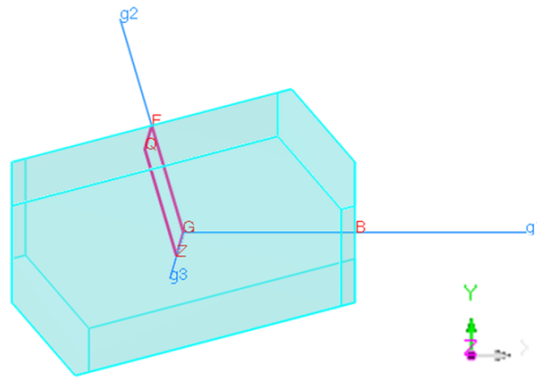

G (0.000, 0.000, 0.000)    F (0.000, 0.500, 0.000)  
Q (0.000,0.500, 0.500)    Z (0.000,0.000, 0.500)  
G (0.000,0.000, 0.000)

**Figure S13** Total density of states and partial density of states of  $\text{Ba}_2\text{B}_{10}\text{O}_{17}$ .

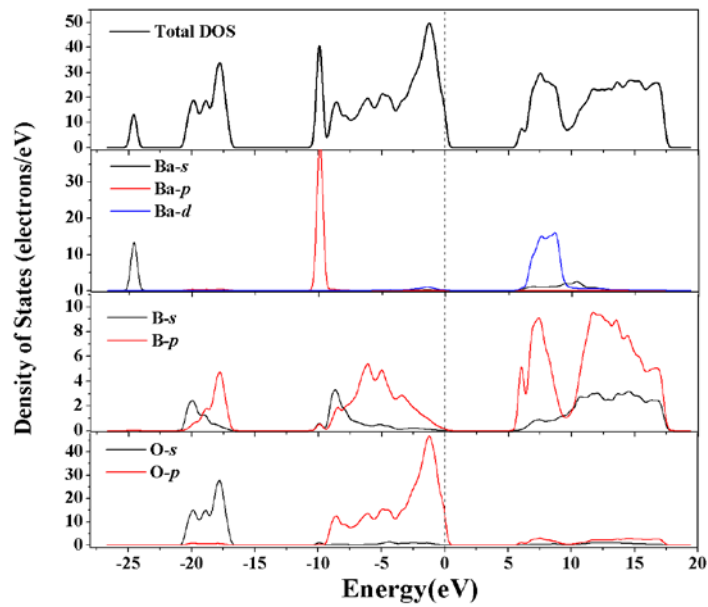

Supplement: c4dt00546e1.pdf [file c4dt00546e1.pdf]
